# Supplementary material for: Bioactive Compounds and Health-Promoting Properties of Pear (Pyrus communis L.) Fruits
Source: PubMed Central journal article supplement (PMC7582546; doi:10.3390/molecules25194444), 2020-09-27
Supplement: molecules-25-04444-s001.pdf [file molecules-25-04444-s001.pdf]

## Supplementary Materials

# Bioactive Compounds and Health-Promoting Properties of Pear (*Pyrus communis* L.) Fruits

Joanna Kolniak-Ostek <sup>1,\*</sup>, Dagmara Kłopotowska <sup>2</sup>, Krzysztof P. Rutkowski <sup>3</sup>, Anna Skorupińska <sup>3</sup> and Dorota E. Kruczyńska <sup>3</sup>

<sup>1</sup> Department of Fruit, Vegetable and Plant Nutraceutical Technology, Wrocław University of Environmental and Life Sciences, Chelmonskiego 37 Street, 51-630 Wrocław, Poland

<sup>2</sup> Laboratory of Experimental Anticancer Therapy, Institute of Immunology and Experimental Therapy, Polish Academy of Sciences, Weigla 12 Street, 53-114 Wrocław, Poland; [dagmara.kłopotowska@hirszfeld.pl](mailto:dagmara.kłopotowska@hirszfeld.pl)

<sup>3</sup> Research Institute of Horticulture, Konstytucji 3 Maja 1/3 Street, 96-100 Skierniewice, Poland; [krzysztof.rutkowski@inhort.pl](mailto:krzysztof.rutkowski@inhort.pl) (K.P.R.); [anna.skorupinska@inhort.pl](mailto:anna.skorupinska@inhort.pl) (A.S.); [dorota.kruczynska@inhort.pl](mailto:dorota.kruczynska@inhort.pl) (D.E.K.)

\* Correspondence: [joanna.kolniak-ostek@upwr.edu.pl](mailto:joanna.kolniak-ostek@upwr.edu.pl)

**Table S1.** Content of polyphenolic compounds [mg/kg DW] and polyphenol oxidase activity [ $\Delta$ U/g min] in pear cultivars.

|                                       | Hortensia                    | Conference        | Alexander Lucas    | Nojabrska          | Radana            | minimum | maximum | mean    |
|---------------------------------------|------------------------------|-------------------|--------------------|--------------------|-------------------|---------|---------|---------|
| <i>Phenolic acids</i>                 |                              |                   |                    |                    |                   |         |         |         |
| Caffeic acid and derivatives          | 936.92 ± 32.5 b <sup>1</sup> | 550.42 ± 13.28 a  | 1167.68 ± 33.28 c  | 3423.89 ± 45.81 e  | 2183.61 ± 15.66 d | 550.42  | 3423.89 | 1652.50 |
| p-Coumaric acid and derivatives       | 57.82 ± 2.35 c               | 15.69 ± 0.55 b    | 2.45 ± 0.01 a      | 84.56 ± 3.99 d     | 56.80 ± 4.21 c    | 2.45    | 84.56   | 43.47   |
| Ferulic acid derivatives              | 33.26 ± 1.26 b               | 0.00 ± 0.0 a      | 0.00 ± 0.0 a       | 0.00 ± 0.0 a       | 0.00 ± 0.0 a      | 0.00    | 33.26   | 6.65    |
| Quinic acid                           | 8.38 ± 0.31 b                | 0.00 ± 0.0 a      | 0.00 ± 0.0 a       | 0.00 ± 0.0 a       | 37.29 ± 1.12 c    | 0.00    | 37.29   | 9.13    |
| Sinapic acid derivatives              | 201.58 ± 10.02 b             | 0.00 ± 0.0 a      | 0.00 ± 0.0 a       | 0.00 ± 0.0 a       | 0.00 ± 0.0 a      | 0.00    | 201.58  | 40.32   |
| Syringic acid derivatives             | 582.82 ± 15.55 d             | 204.55 ± 8.27 c   | 87.09 ± 2.99 b     | 0.00 ± 0.0 a       | 2243.45 ± 18.17 e | 0.00    | 2243.45 | 623.58  |
| Sum                                   | 1820.78 ± 39.34 c            | 770.67 ± 21.00 a  | 1257.22 ± 30.2 b   | 3508.45 ± 41.82 d  | 4521.15 ± 36.92 e | 770.67  | 4521.15 | 2375.65 |
| <i>Flavan-3-ols and procyanidines</i> |                              |                   |                    |                    |                   |         |         |         |
| Monomeric catechins                   | 871.26 ± 24.15 d             | 593.38 ± 14.28 b  | 575.80 ± 15.87 b   | 664.05 ± 15.15 c   | 253.05 ± 8.99 a   | 253.05  | 871.26  | 591.51  |
| Polymeric procyanidines               | 89.65 ± 3.55 a               | 142.95 ± 4.15 b   | 226.68 ± 7.54 c    | 444.69 ± 20.78 d   | 205.71 ± 8.02 c   | 89.65   | 444.69  | 221.93  |
| Sum                                   | 960.90 ± 27.7 d              | 736.33 ± 18.43 b  | 802.48 ± 23.41 c   | 1108.74 ± 5.63 e   | 458.75 ± 17.01 a  | 458.75  | 1108.74 | 813.44  |
| <i>Flavonols</i>                      |                              |                   |                    |                    |                   |         |         |         |
| Kaempferol derivatives                | 20.80 ± 1.25 b               | 17.00 ± 0.21 b    | 0.00 ± 0.0 a       | 3.86 ± 0.12 b      | 196.87 ± 6.69 c   | 0.00    | 196.87  | 47.70   |
| Isorhamnetin derivatives              | 443.01 ± 10.94 d             | 328.22 ± 6.62 c   | 182.63 ± 9.15 b    | 102.66 ± 2.15 a    | 486.75 ± 17.89 e  | 102.66  | 486.75  | 308.65  |
| Quercetin derivatives                 | 407.81 ± 14.43 e             | 67.45 ± 2.78 b    | 122.26 ± 6.03 c    | 29.28 ± 4.12 a     | 372.59 ± 13.13 d  | 29.28   | 407.81  | 199.88  |
| Sum                                   | 871.61 ± 26.62 d             | 412.67 ± 4.05 c   | 304.89 ± 15.18 b   | 135.79 ± 6.39 a    | 1056.20 ± 1.93 e  | 135.79  | 1056.20 | 556.23  |
| <i>Flavones</i>                       |                              |                   |                    |                    |                   |         |         |         |
| Apigenin derivatives                  | 89.10 ± 15.77 b              | 68.67 ± 1.89 a    | 101.10 ± 7.74 c    | 160.70 ± 8.01 d    | 158.05 ± 9.61 d   | 68.67   | 160.70  | 115.52  |
| <i>Hydrochalcones</i>                 |                              |                   |                    |                    |                   |         |         |         |
| Arbutin                               | 286.70 ± 20.69 c             | 200.59 ± 5.94 a   | 229.82 ± 8.11 b    | 212.48 ± 5.55 a    | 493.56 ± 13.00 d  | 200.59  | 493.56  | 284.63  |
| Sum of phenolic compounds             | 4029.09 ± 116.27 c           | 2188.93 ± 14.25 a | 2874.93 ± 110.36 b | 4946.74 ± 115.64 d | 6687.71 ± 18.45 e | 2188.93 | 6687.71 | 4438.32 |
| PPO activity                          | 487.86 ± 15.30 b             | 458.94 ± 17.80 a  | 542.47 ± 21.00 c   | 592.92 ± 22.60 d   | 739.80 ± 25.80 e  | 458.94  | 739.80  | 654.40  |

<sup>1</sup> Data are expressed as mean ± SD ( $n = 9$ ). Means followed by the same letter in the rows are not significantly different at  $p = 0.05$  according to Duncan's test.

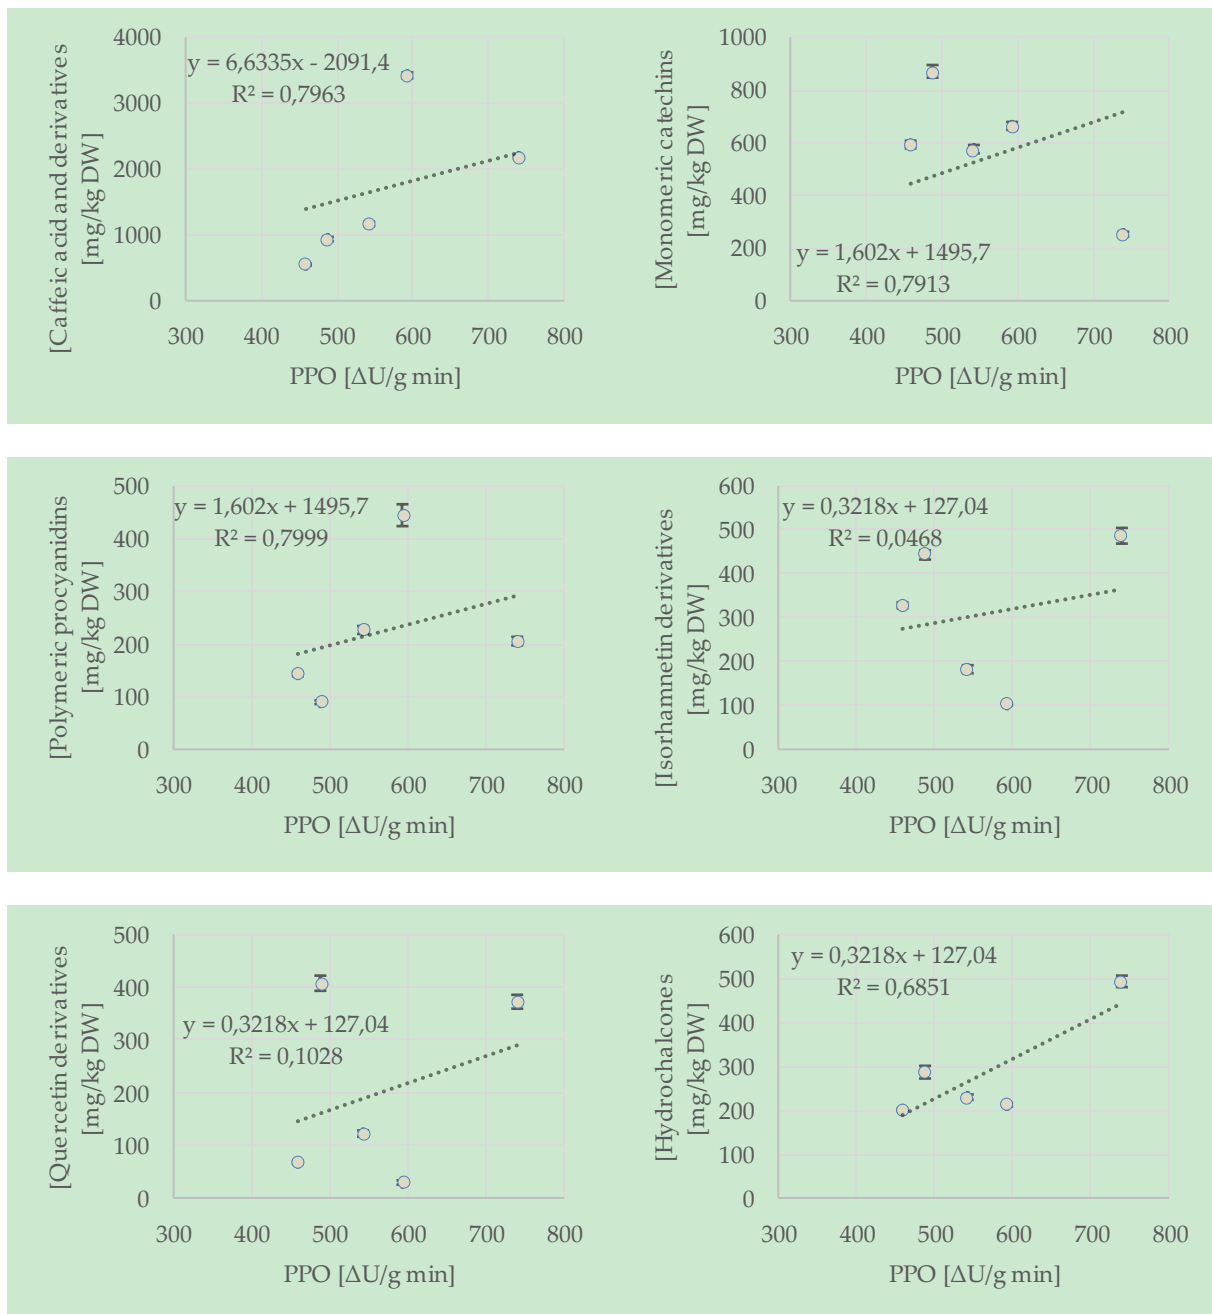

**Figure S1.** Correlation coefficient calculated for polyphenolic compounds and PPO activity. Data are expressed as mean  $\pm$  SD ( $n = 9$ ).

**Table S2.** Content of triterpenoids, chlorophylls and carotenoids [mg/kg DW] in pear cultivars.

|                             | Hortensia                   | Conference      | Alexander Lucas  | Nojabrska         | Radana            | <i>minimum</i> | <i>maximum</i> | <i>mean</i> |
|-----------------------------|-----------------------------|-----------------|------------------|-------------------|-------------------|----------------|----------------|-------------|
| Betulinic acid              | 52.90 ± 4.21 b <sup>1</sup> | 77.63 ± 5.89 c  | 76.94 ± 6.32 c   | 116.12 ± 4.22 d   | 25.90 ± 1.12 a    | 25.90          | 116.12         | 69.90       |
| Oleanolic acid              | 87.00 ± 4.89 c              | 41.16 ± 3.15 a  | 74.47 ± 5.88 b   | 239.34 ± 6.97 e   | 118.84 ± 5.83 d   | 41.16          | 239.34         | 112.16      |
| Ursolic acid                | 370.71 ± 8.77 b             | 333.92 ± 9.01 a | 451.95 ± 10.01 a | 1190.71 ± 16.10 e | 1107.73 ± 11.11 d | 333.92         | 1190.71        | 691.00      |
| <i>Sum of triterpenoids</i> | 510.61 ± 8.09 b             | 452.71 ± 0.03 a | 603.36 ± 2.19 c  | 1546.17 ± 27.29 e | 1252.47 ± 15.82d  | 452.71         | 1546.17        | 873.06      |
| Pheophorbide a              | 0.26 ± 0.00 b               | 0.18 ± 0.00 a   | 0.58 ± 0.00 c    | 0.18 ± 0.00a      | 0.67 ± 0.00 d     | 0.18           | 0.67           | 0.37        |
| Chlorophyllide b            | 2.26 ± 0.10 b               | 0.00 ± 0.00 a   | 2.44 ± 0.10 b    | 7.45 ± 0.52 d     | 5.22 ± 0.09 c     | 0.00           | 7.45           | 3.47        |
| Chlorophyllide a            | 76.73 ± 2.35 c              | 114.29 ± 5.25 e | 56.76 ± 1.99 b   | 34.71 ± 1.89 a    | 107.93 ± 5.22 d   | 34.71          | 114.29         | 78.08       |
| Chlorophyll b               | 0.67 ± 0.00 b               | 0.79 ± 0.00 c   | 0.43 ± 0.00 a    | 0.37 ± 0.00 a     | 0.81 ± 0.00 c     | 0.37           | 0.81           | 0.61        |
| Chlorophyll a <sup>s</sup>  | 0.86 ± 0.00 c               | 0.92 ± 0.00 c   | 0.66 ± 0.00 b    | 0.37 ± 0.00 a     | 0.93 ± 0.00 c     | 0.37           | 0.93           | 0.75        |
| Pheophytine b               | 79.72 ± 3.12 b              | 85.85 ± 6.21 c  | 15.31 ± 1.02 a   | 16.24 ± 0.45 a    | 124.65 ± 4.38 d   | 15.31          | 124.65         | 64.35       |
| Pheophytine a               | 32.19 ± 1.05 c              | 34.34 ± 2.89 c  | 12.37 ± 0.87 a   | 18.10 ± 0.71 b    | 51.53 ± 1.11 d    | 12.37          | 51.53          | 29.70       |
| <i>Sum of chlorophylls</i>  | 192.68 ± 1.76 c             | 236.37 ± 1.93 d | 88.55 ± 3.98 b   | 77.43 ± 1.11 a    | 291.74 ± 1.86 e   | 77.43          | 291.74         | 177.35      |
| <i>all-trans</i> -Lutein    | 4.40 ± 0.21 c               | 4.69 ± 0.15 c   | 1.69 ± 0.01 a    | 2.47 ± 0.01 b     | 7.04 ± 0.44 d     | 1.69           | 7.04           | 4.06        |
| 13- <i>cis</i> -Lutein      | 5.39 ± 0.66 d               | 4.80 ± 0.67 c   | 2.98 ± 0.01 a    | 3.28 ± 0.02 b     | 7.87 ± 0.29 e     | 2.98           | 7.87           | 4.87        |
| <i>all-trans</i> β-Carotene | 5.70 ± 0.36 b               | 1.67 ± 0.00 a   | 1.54 ± 0.00 a    | 12.58 ± 0.86 c    | 13.98 ± 1.47 d    | 1.54           | 13.98          | 7.09        |
| 9- <i>cis</i> -β-Carotene   | 63.99 ± 2.28 d              | 26.35 ± 1.01 ab | 23.70 ± 1.71 a   | 52.54 ± 1.56 c    | 117.72 ± 3.30 e   | 23.70          | 117.72         | 56.86       |
| <i>Sum of carotenoids</i>   | 79.48 ± 3.51 d              | 37.52 ± 0.19 b  | 29.91 ± 1.00 a   | 70.87 ± 2.45 c    | 146.61 ± 1.98 e   | 29.91          | 146.61         | 72.88       |

<sup>1</sup>Data are expressed as mean ± SD (*n* = 9). Means followed by the same letter in the rows are not significantly different at *p* = 0.05 according to Duncan's test.

**Table S3.** Antioxidant activity of pear cultivars [mMol Trolox/kg DW].

|      | <b>Hortensia</b>           | <b>Conference</b> | <b>Alexander Lucas</b> | <b>Nojabrska</b> | <b>Radana</b>  | <i>minimum</i> | <i>maximum</i> | <i>mean</i> |
|------|----------------------------|-------------------|------------------------|------------------|----------------|----------------|----------------|-------------|
| DPPH | 4.96 ± 0.16 c <sup>1</sup> | 3.98 ± 0.10 a     | 4.42 ± 0.21 b          | 5.42 ± 0.21 d    | 7.70 ± 0.26 e  | 3.98           | 7.70           | 4.30        |
| FRAP | 11.54 ± 0.31 d             | 4.37 ± 0.11 a     | 5.40 ± 0.12 b          | 9.40 ± 0.24 c    | 15.64 ± 0.33 e | 4.37           | 15.64          | 9.27        |

<sup>1</sup>Data are expressed as mean ± SD (*n* = 9). Means followed by the same letter in the rows are not significantly different at *p* = 0.05 according to Duncan's test.

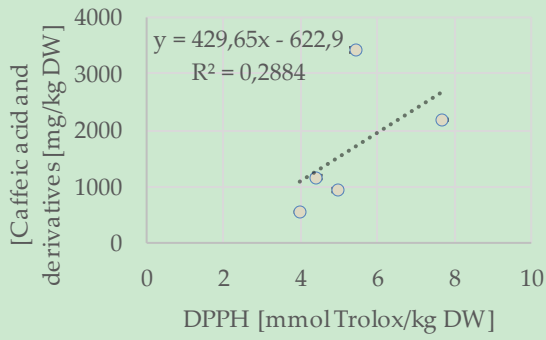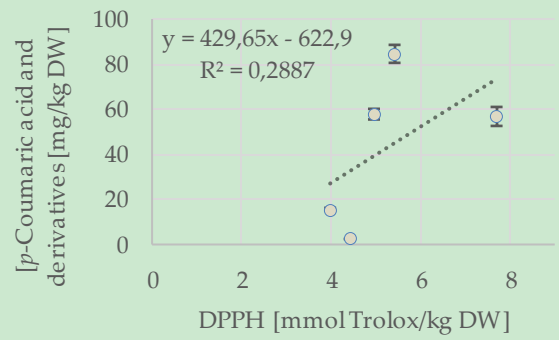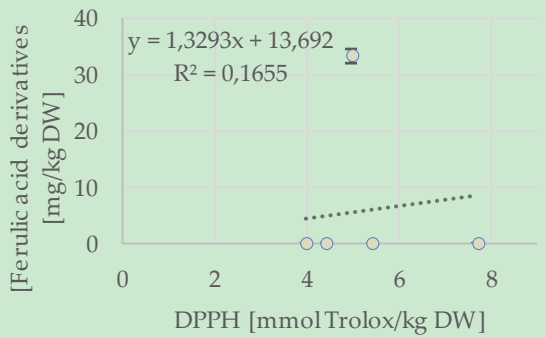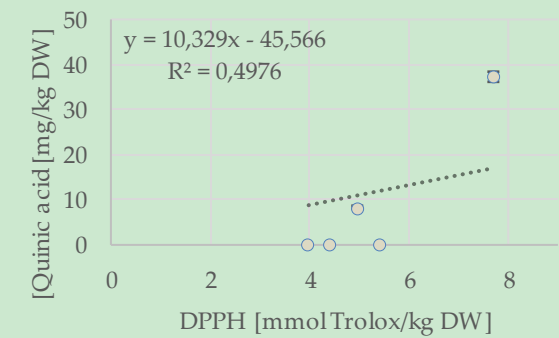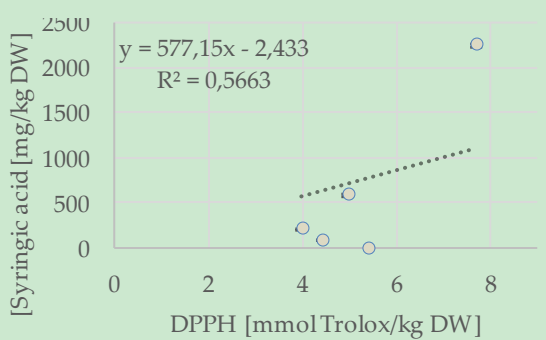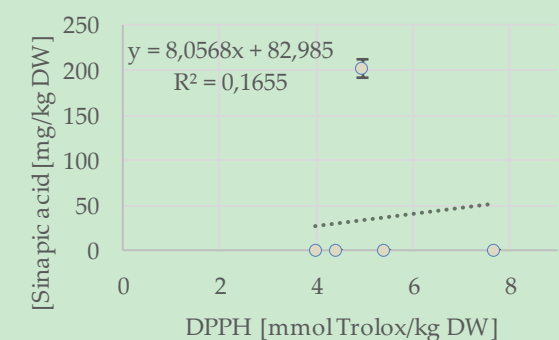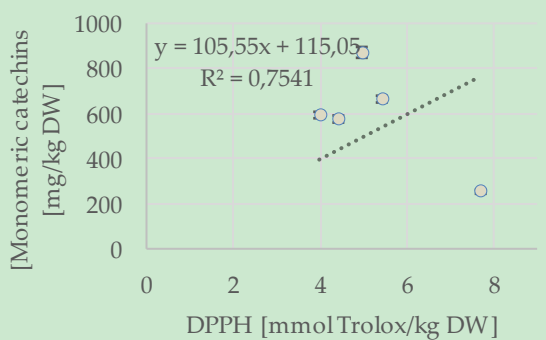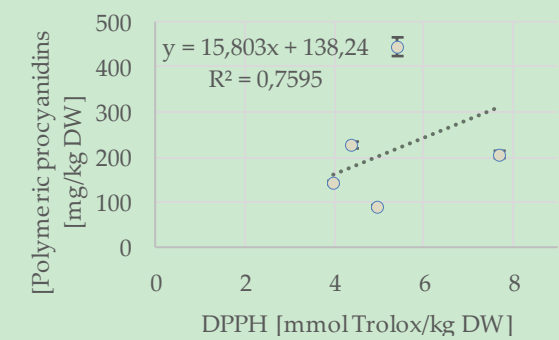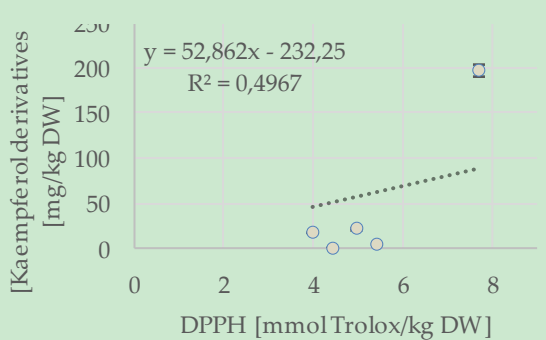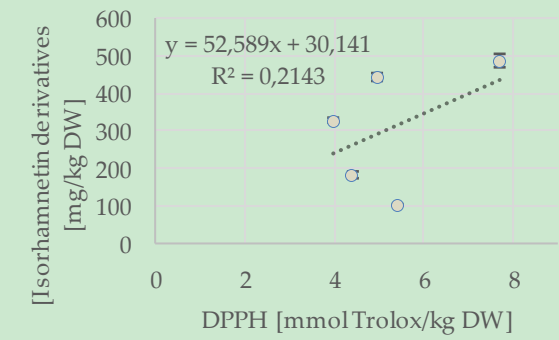

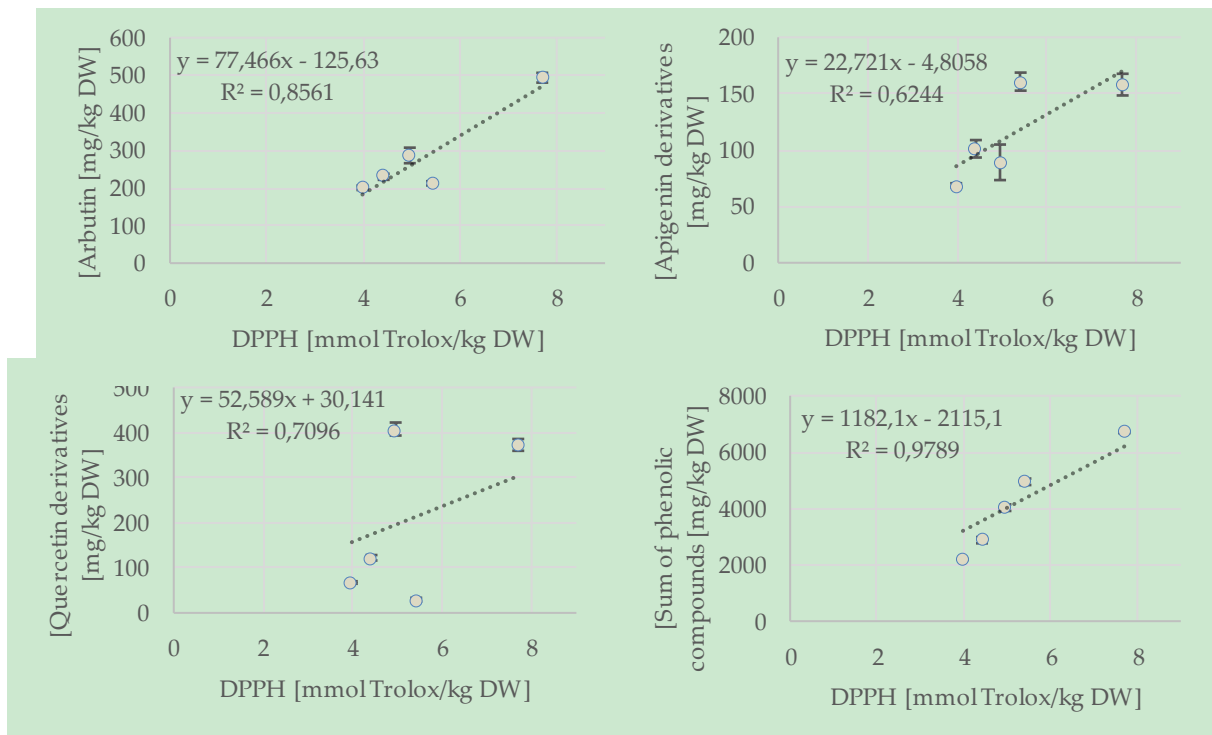

**Figure S2.** Correlation coefficient calculated for polyphenolic compounds and DPPH activity. Data are expressed as mean  $\pm$  SD ( $n = 9$ ).

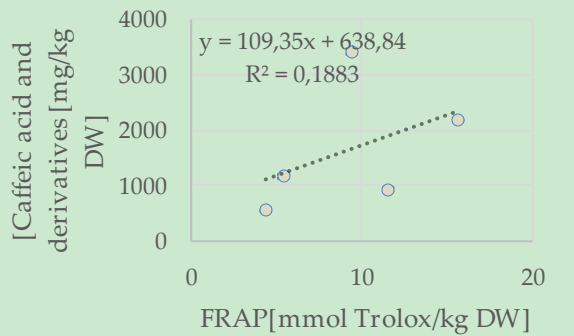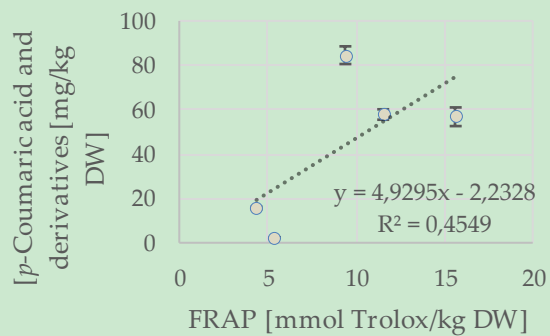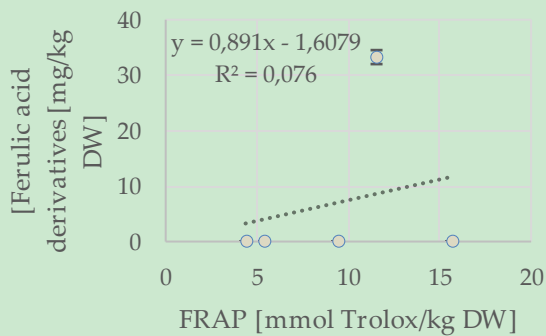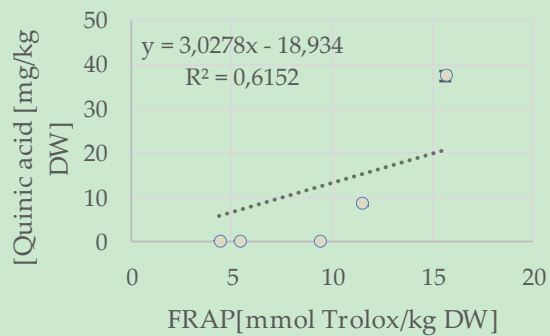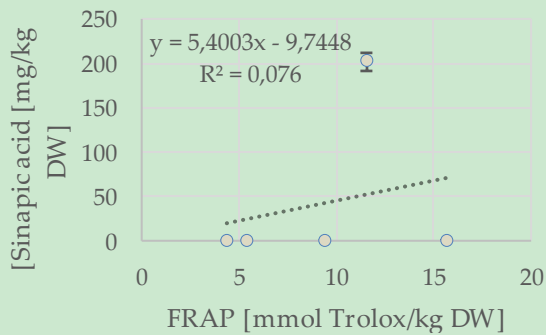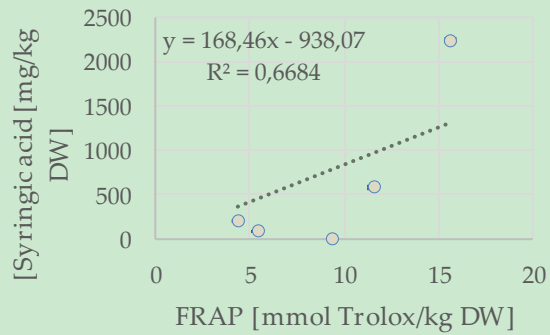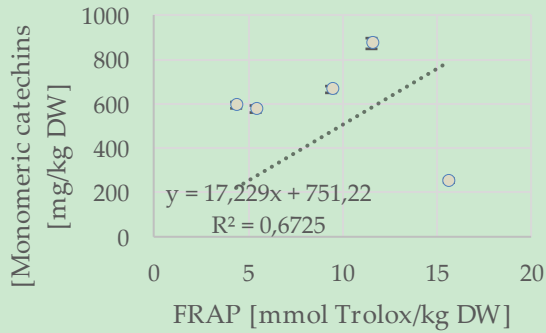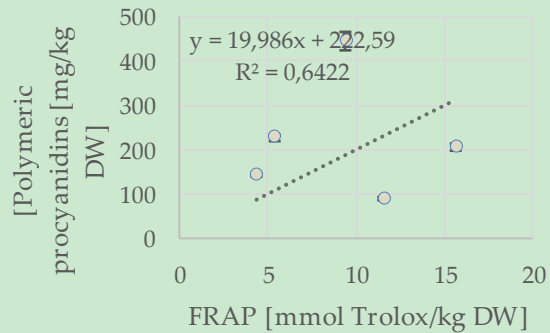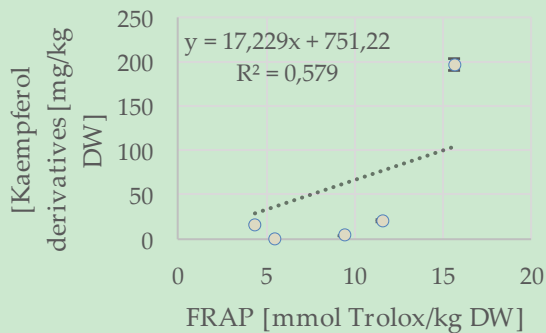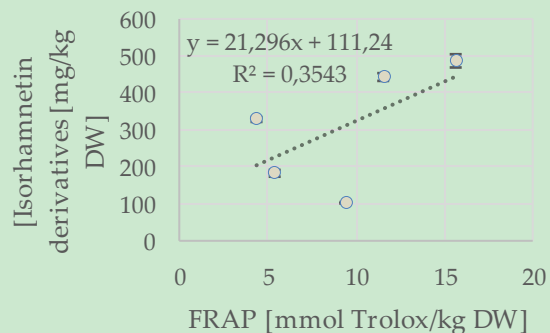

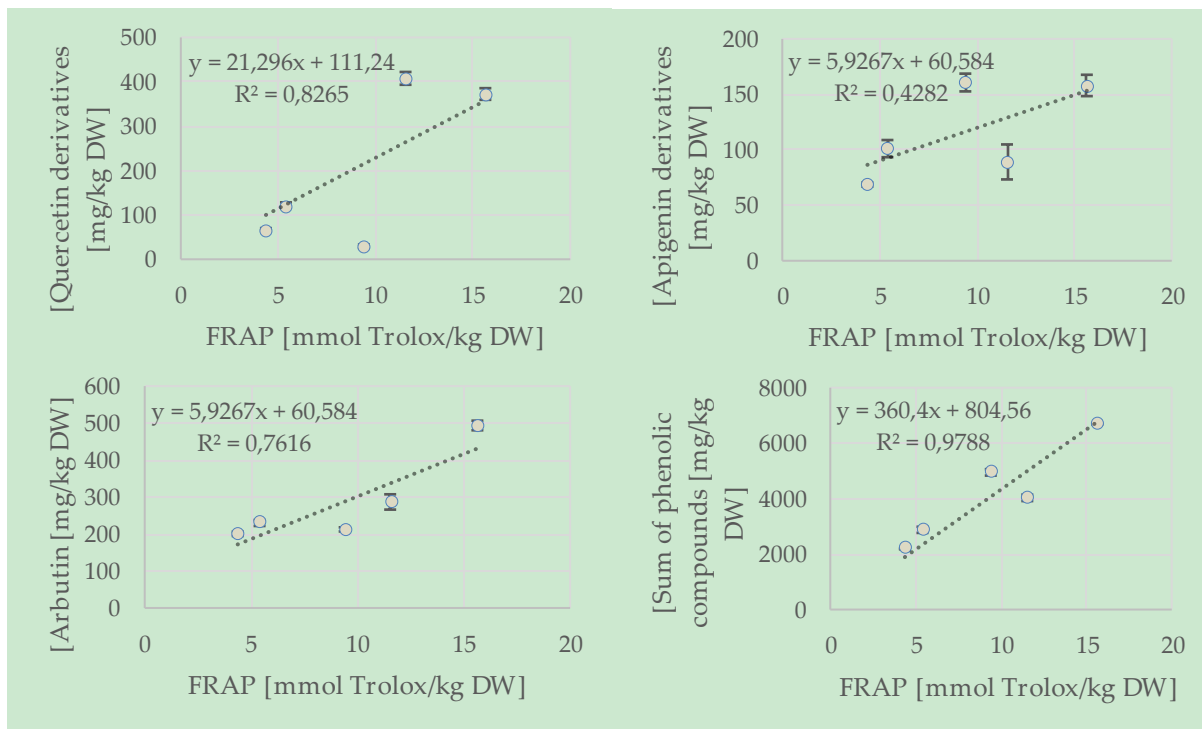

**Figure S3.** Correlation coefficient calculated for polyphenolic compounds and FRAP activity. Data are expressed as mean  $\pm$  SD ( $n = 9$ ).



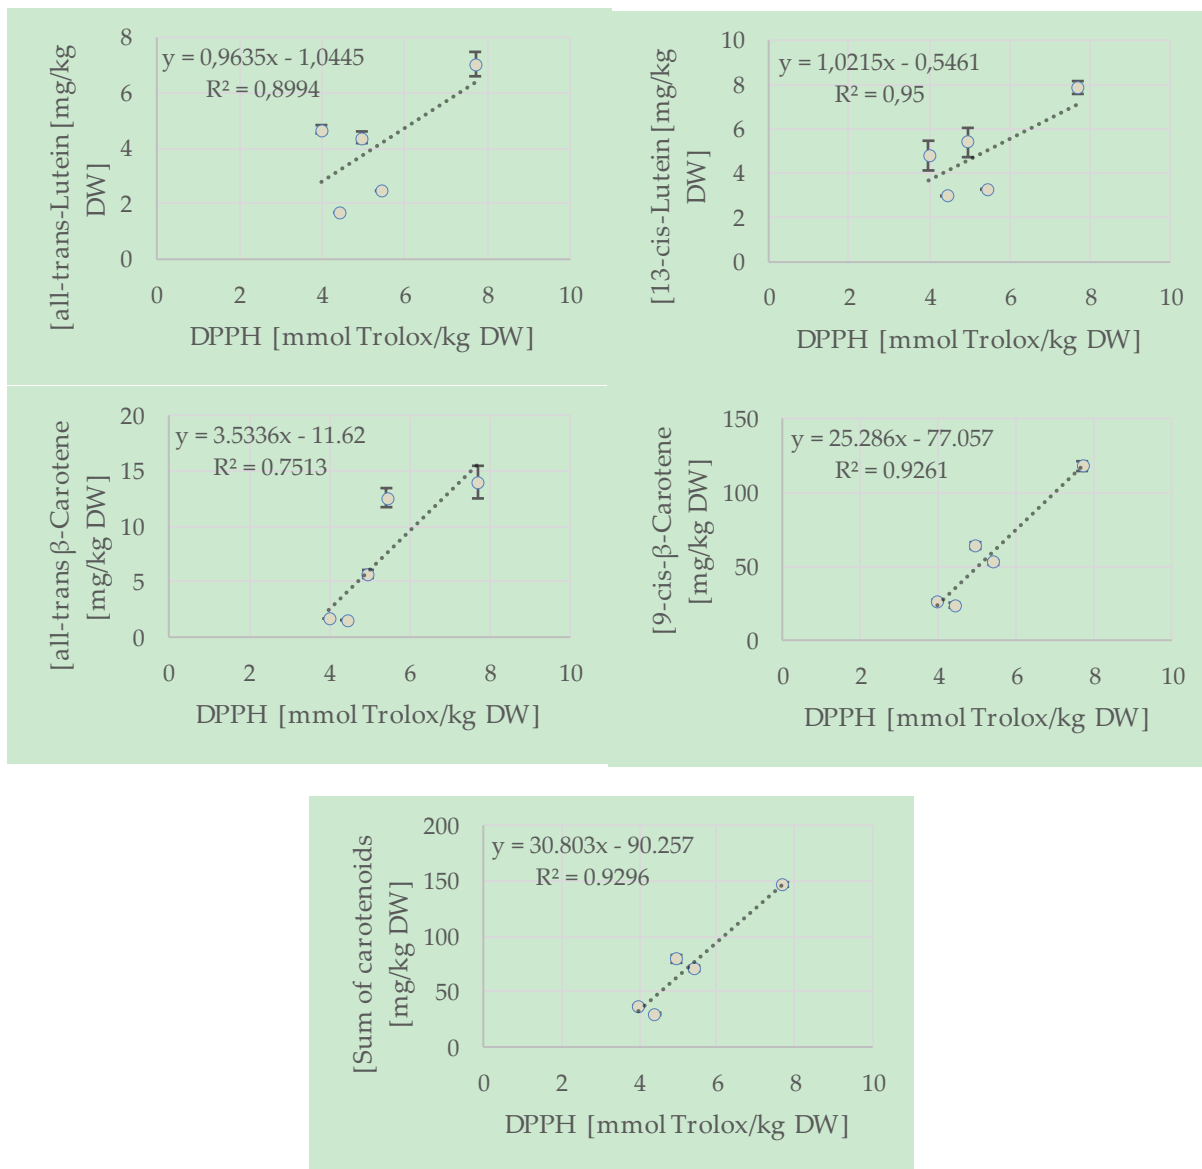

**Figure S4.** Correlation coefficient calculated for carotenoids and DPPH antioxidant activity. Data are expressed as mean  $\pm$  SD ( $n = 9$ ).

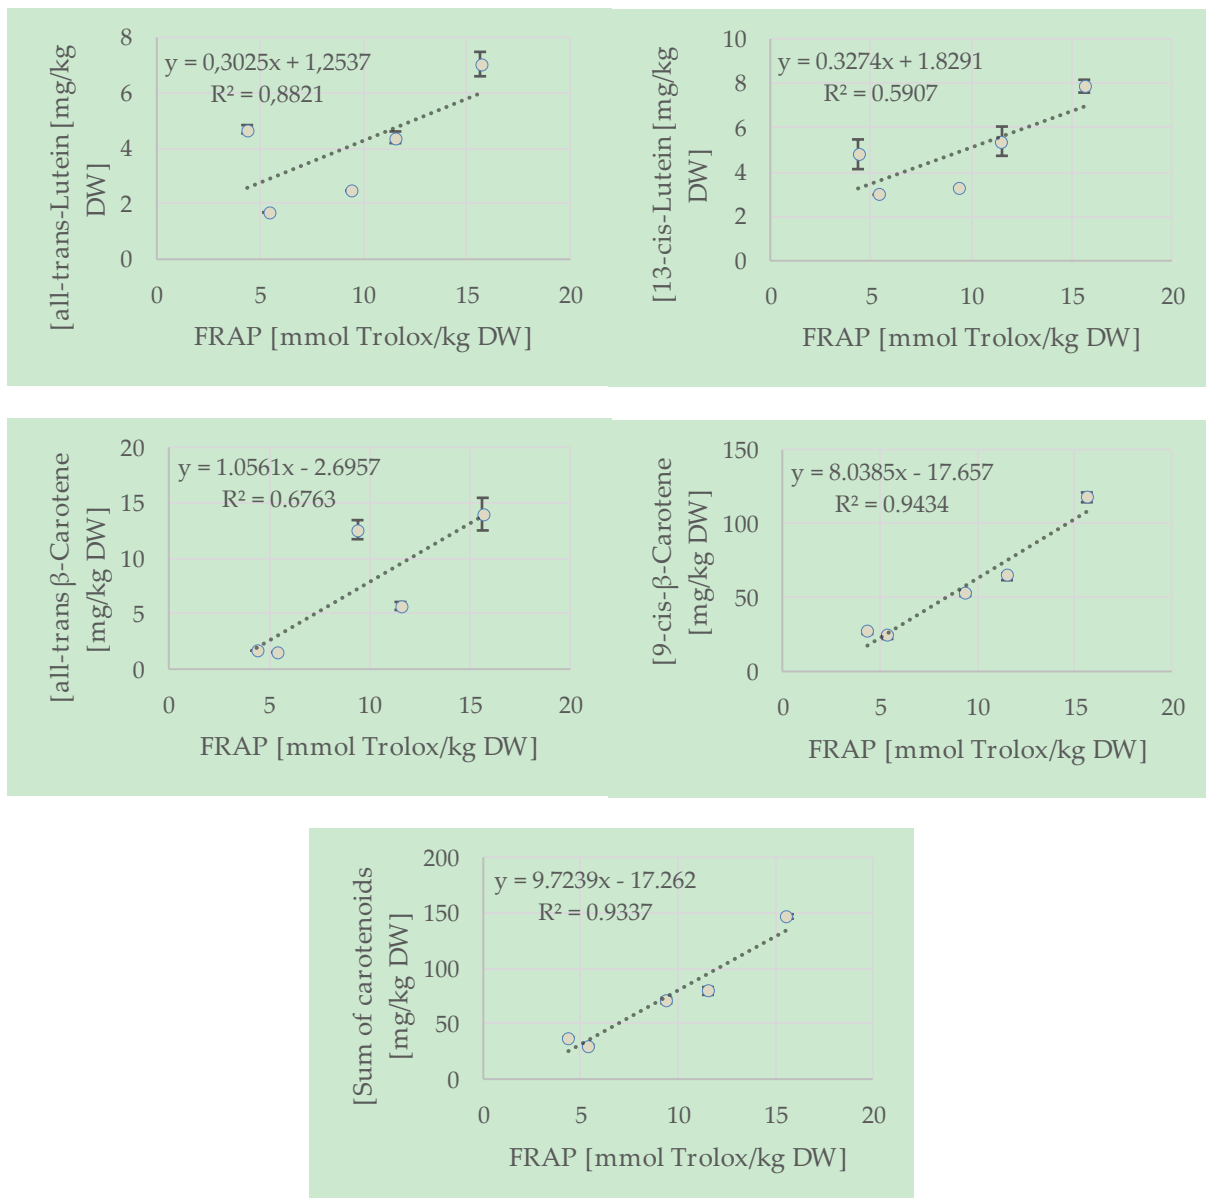

**Figure S5.** Correlation coefficient calculated for carotenoids and FRAP antioxidant activity. Data are expressed as mean  $\pm$  SD ( $n = 9$ ).

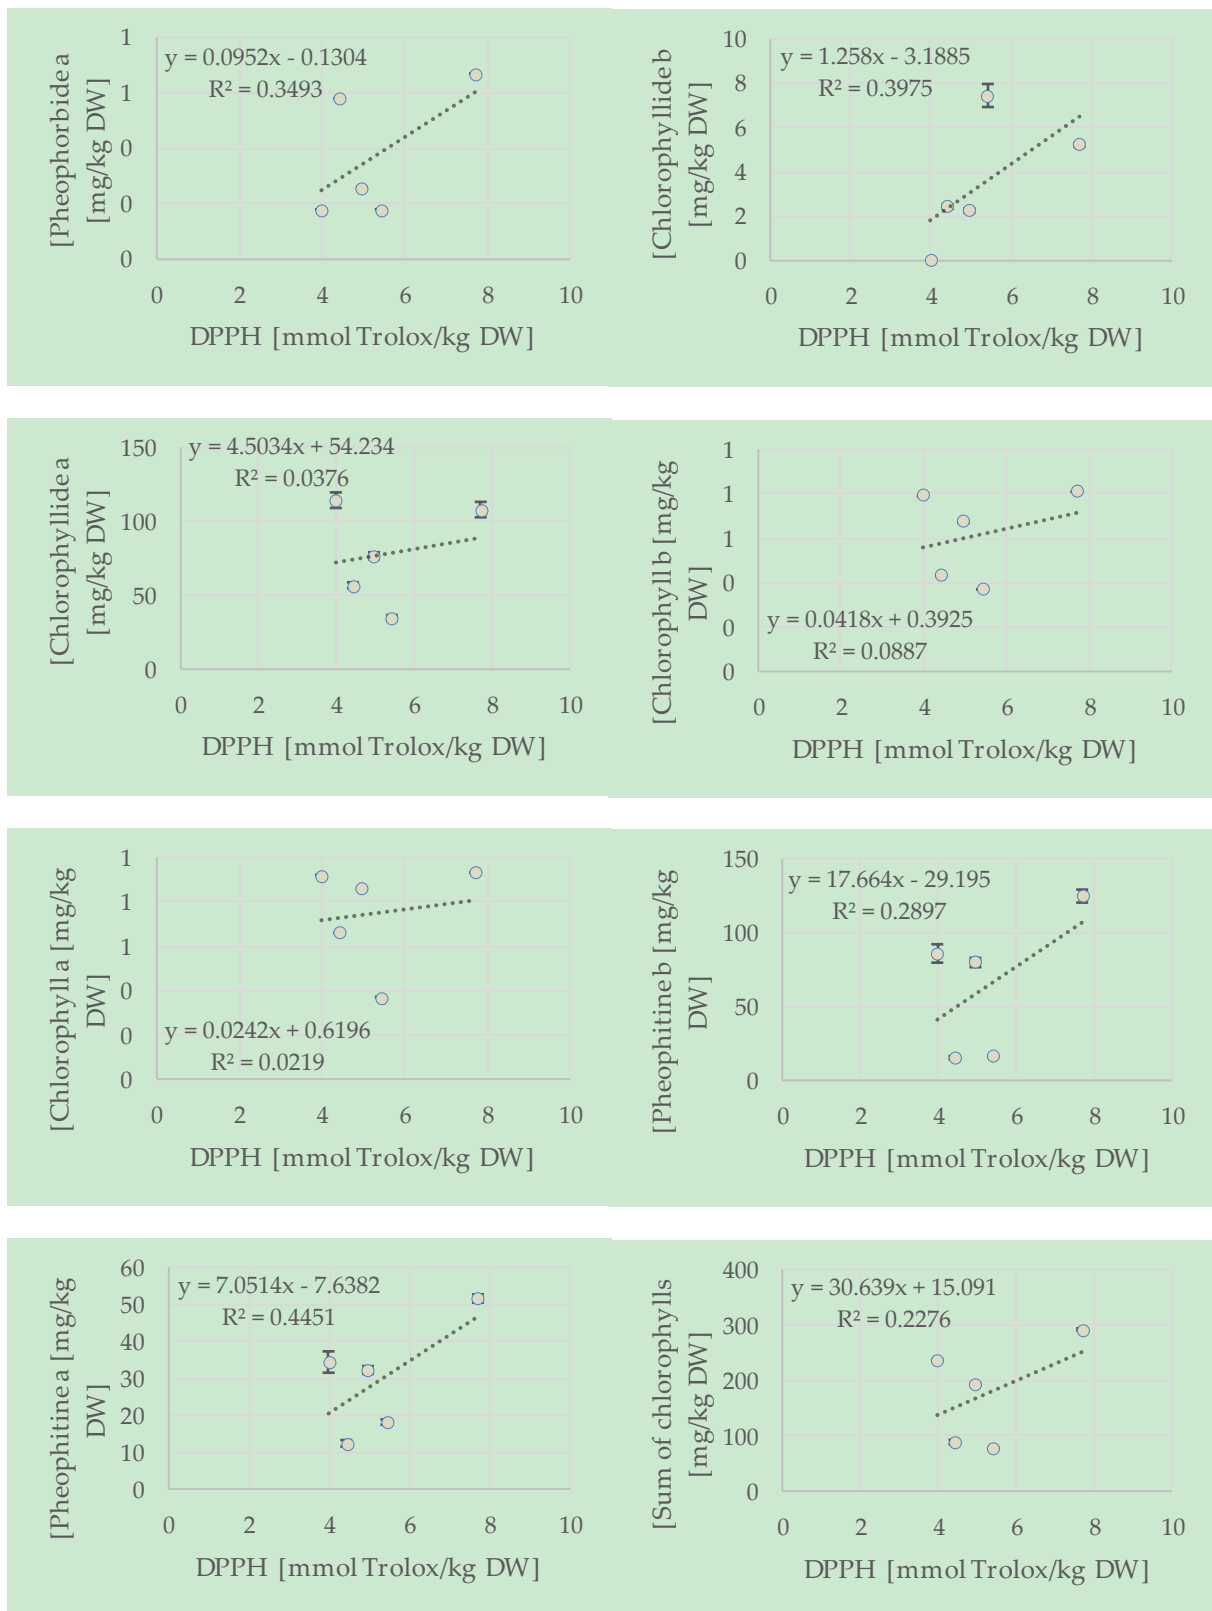

**Figure S6.** Correlation coefficient calculated for chlorophylls and DPPH antioxidant activity. Data are expressed as mean  $\pm$  SD ( $n = 9$ ).

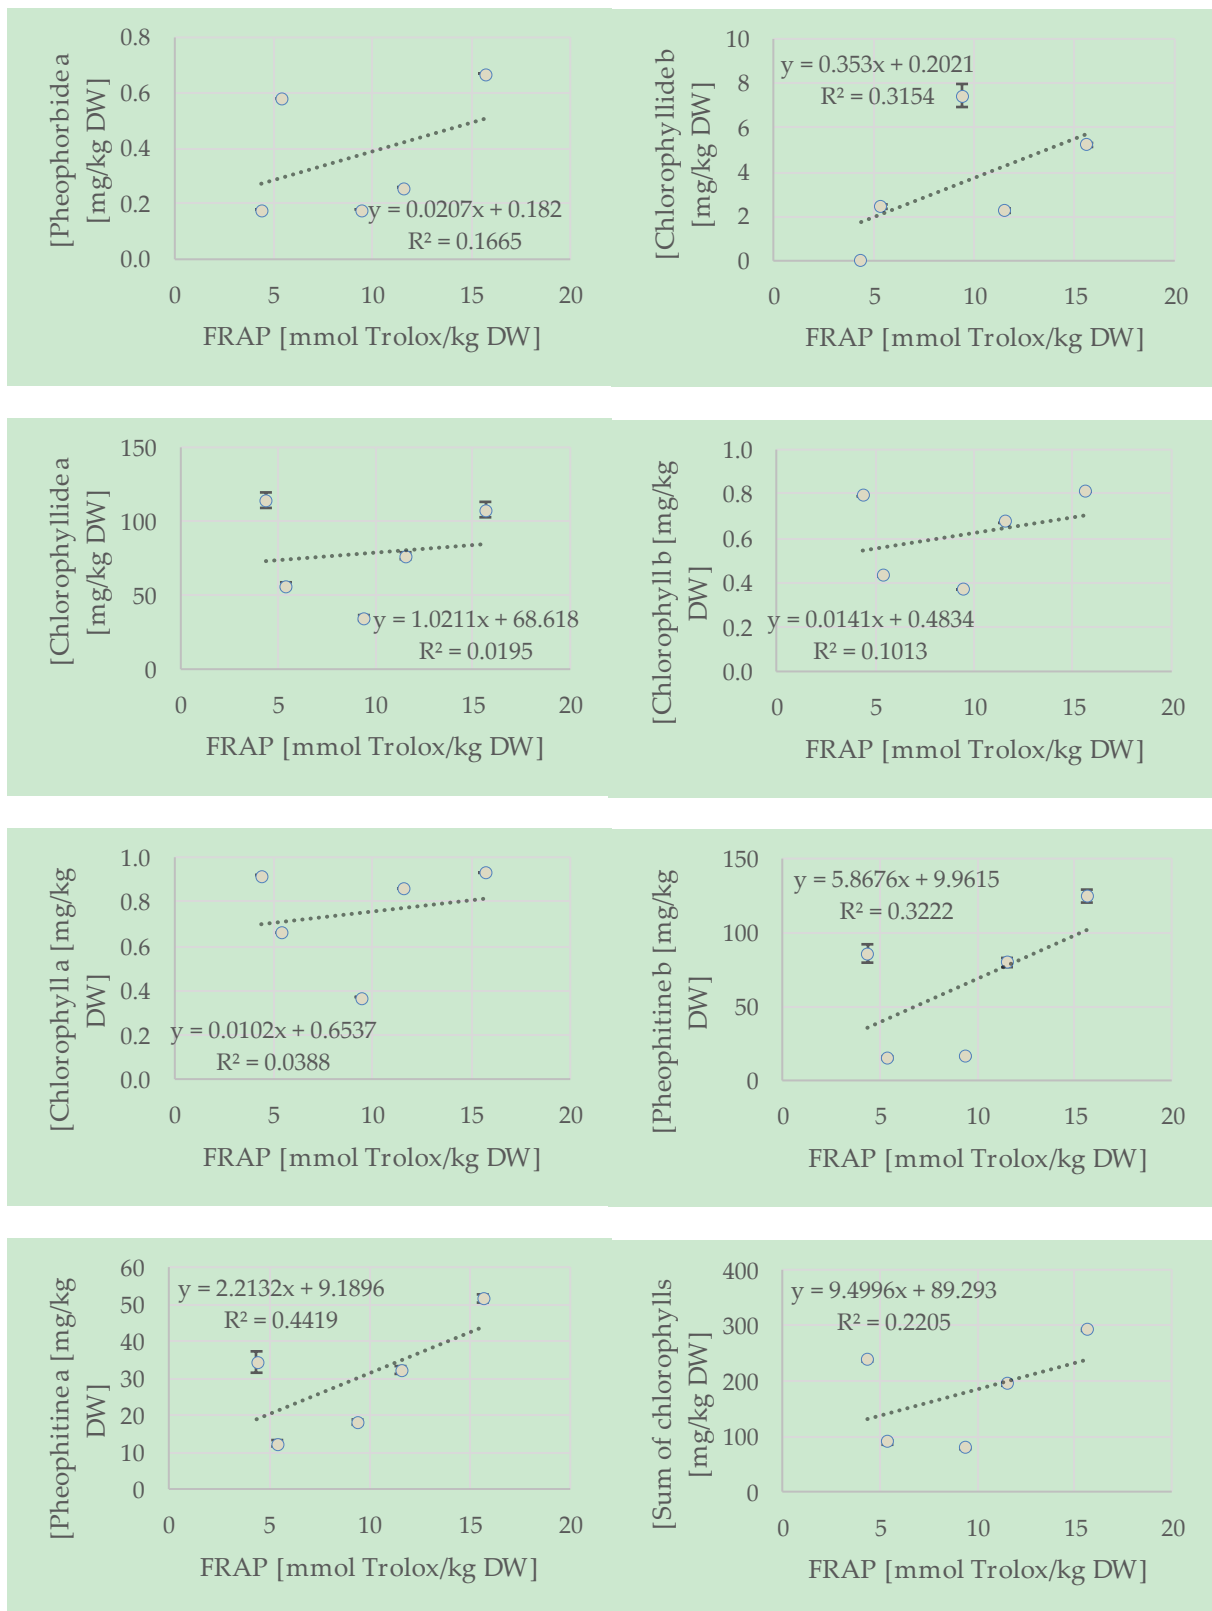

**Figure S7.** Correlation coefficient calculated for chlorophylls and FRAP antioxidant activity. Data are expressed as mean  $\pm$  SD ( $n = 9$ ).

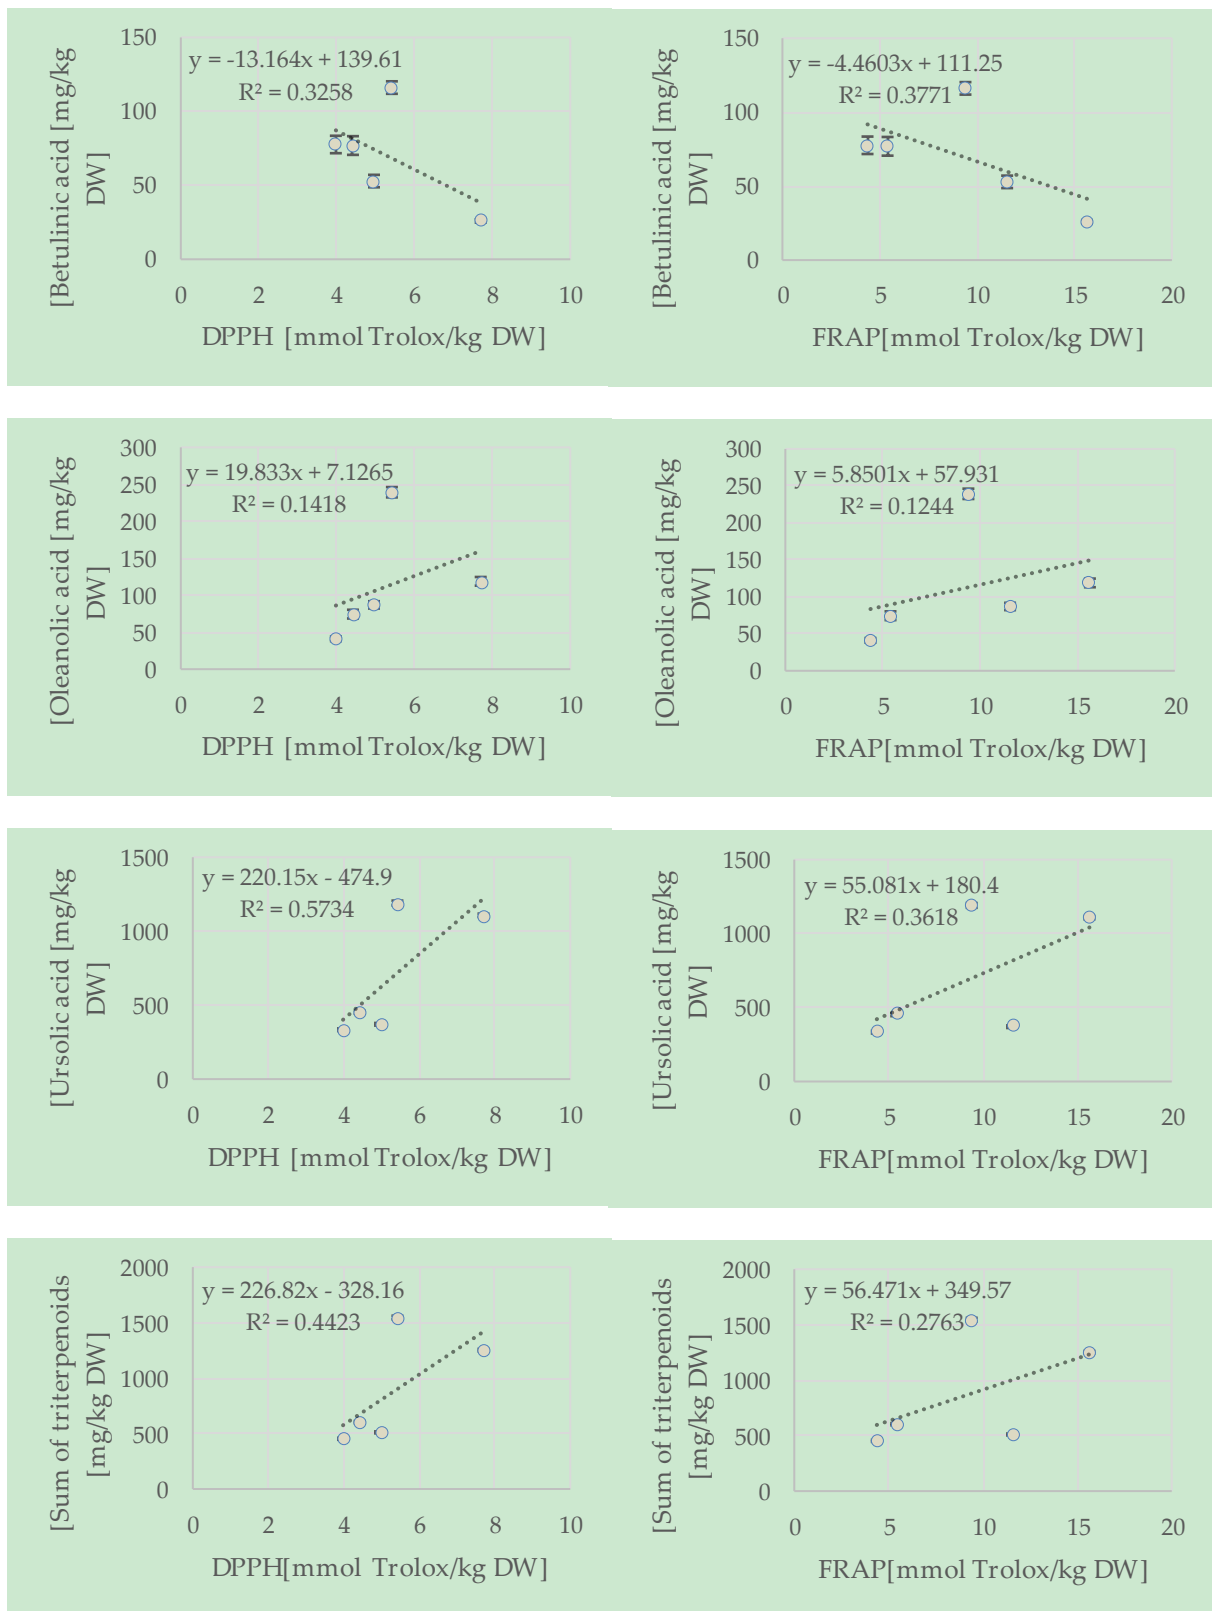

**Figure S8.** Correlation coefficient calculated for triterpenoids and antioxidant activity (DPPH and FRAP). Data are expressed as mean  $\pm$  SD ( $n = 9$ ).

**Table S4.** Anti-inflammatory properties of pear cultivars [% of inhibition].

|       | <b>Hortensia</b>            | <b>Conference</b> | <b>Alexander Lucas</b> | <b>Nojabrska</b> | <b>Radana</b>  | <i>minimum</i> | <i>maximum</i> | <i>mean</i> |
|-------|-----------------------------|-------------------|------------------------|------------------|----------------|----------------|----------------|-------------|
| COX-1 | 38.91 ± 0.52 a <sup>1</sup> | 74.02 ± 1.23 b    | 33.83 ± 0.67 a         | 31.95 ± 0.33 a   | 75.93 ± 1.00 b | 31.95          | 75.93          | 50.93       |
| COX-2 | 45.43 ± 0.68 b              | 81.88 ± 1.11 c    | 38.52 ± 1.51 a         | 34.14 ± 1.27 a   | 90.80 ± 1.32 d | 34.14          | 90.80          | 58.15       |

<sup>1</sup>Data are expressed as mean ± SD (*n* = 9). Means followed by the same letter in the rows are not significantly different at *p* = 0.05 according to Duncan's test.

**Table S5.** Antiproliferative properties of pear cultivars [IC50].

|        | Hortensia                 | Conference    | Alexander Lucas | Nojabrska     | Radana        | <i>maximum</i> | <i>minimum</i> | <i>mean</i> |
|--------|---------------------------|---------------|-----------------|---------------|---------------|----------------|----------------|-------------|
| A498   | 2.85 ± 0.57c <sup>1</sup> | 3.19 ± 0.13 d | 3.31 ± 0.02 d   | 3.30 ± 0.11 d | 1.81 ± 0.76 a | 3.31           | 1.81           | 2.89        |
| A549   | 2.22 ± 0.69 d             | 0.43 ± 0.21 a | 2.52 ± 0.25 d   | 1.86 ± 0.70 c | 1.02 ± 0.41 b | 2.52           | 0.43           | 1.61        |
| HCV29T | 0.68 ± 0.23 c             | 0.32 ± 0.00 a | 1.43 ± 0.47 e   | 1.06 ± 0.25 d | 0.64 ± 0.10 c | 1.43           | 0.32           | 0.83        |
| HT-29  | 2.42 ± 0.19 e             | 2.11 ± 0.75 d | 1.61 ± 0.32 c   | 1.14 ± 0.18 b | 0.44 ± 0.08 a | 2.42           | 0.44           | 1.54        |
| LNCaP  | 1.48 ± 0.31 e             | 0.97 ± 0.83 b | 1.37 ± 0.51 d   | 1.16 ± 0.20 c | 0.63 ± 0.19 a | 1.48           | 0.63           | 1.12        |
| MCF-7  | 1.86 ± 0.67 b             | 0.39 ± 0.08 a | 2.23 ± 0.41 c   | 2.18 ± 0.55 c | 2.14 ± 0.54 c | 2.23           | 0.39           | 1.76        |

<sup>1</sup>Data are expressed as mean ± SD (*n* = 9). Means followed by the same letter in the rows are not significantly different at *p* = 0.05 according to Duncan's test.
